# Supplementary material for: MALDI-TOF Mass Spectrometry Online Identification of Trichophyton indotineae Using the MSI-2 Application
Source: MDPI journal article supplement (doi:10.3390/jof8101103), 2022-10-19
Supplement: s1 [file s1]

Supplemental Table S1: List of references belonging to the *T. mentagrophytes*, *T. interdigitale*, and *T. indotineae* species. A=MSI-2 database by Jabet *et al.*; B=MSI-2 database, improved with 12 strains from this study; NR = not recorded.

| Strain name | Genotype                              | Database | Host               | Localization                        | Strain origin |
|-------------|---------------------------------------|----------|--------------------|-------------------------------------|---------------|
| IHEM 28392  | <i>T. indotineae</i>                  | A        | Human              | NR                                  | Germany       |
| IHEM 28386  | <i>T. indotineae</i>                  | A        | Human              | NR                                  | Bahrain       |
| IHEM 28378  | <i>T. indotineae</i>                  | A        | Human              | Skin: foot sole infection           | Germany       |
| IHEM 1104   | <i>T. interdigitale</i> G-I           | A        | Environment        | Floor of a swimming pool            | Belgium       |
| IHEM 1106   | <i>T. interdigitale</i> G-I           | A        | Environment        | Floor of a swimming pool            | Belgium       |
| IHEM 10342  | <i>T. interdigitale</i> G-II          | A        | Human              | Skin: foot sole infection           | NR            |
| IHEM 2497   | <i>T. interdigitale</i> G-II          | A        | Human              | Skin: foot sole infection           | Belgium       |
| IHEM 2643   | <i>T. interdigitale</i> G-II          | A        | Human              | Skin: foot sole infection           | Belgium       |
| IHEM 2771   | <i>T. interdigitale</i> G-II          | A        | Human              | Skin: foot sole infection           | Belgium       |
| IHEM 620    | <i>T. interdigitale</i> G-II          | A        | Human              | Skin: foot sole infection           | Belgium       |
| IDFP 1      | <i>T. interdigitale</i> G-II          | A        | Human              | Skin: arm infection                 | France        |
| IDFP 11     | <i>T. interdigitale</i> G-II          | A        | Human              | NR                                  | France        |
| IDFP 16     | <i>T. interdigitale</i> G-II          | A        | Human              | Toenail infection                   | France        |
| IDFP 2      | <i>T. interdigitale</i> G-II          | A        | Human              | Toenail infection                   | France        |
| IHEM 1120   | <i>T. interdigitale</i> G-II          | A        | Environment        | Floor of a swimming pool            | Belgium       |
| IHEM 584    | <i>T. interdigitale</i> G-II          | A        | Human              | Skin: foot sole infection           | Belgium       |
| ROUT 1      | <i>T. interdigitale</i> G-II          | A        | Human              | Toenail infection                   | France        |
| ROUT 2      | <i>T. interdigitale</i> G-II          | A        | Human              | Toenail infection                   | France        |
| ROUT 3      | <i>T. interdigitale</i> G-II          | A        | Human              | Toenail infection                   | France        |
| ROUT 5      | <i>T. interdigitale</i> G-II          | A        | Human              | Skin: foot sole infection           | France        |
| ROUT 6      | <i>T. interdigitale</i> G-II          | A        | Human              | Skin: foot sole infection           | France        |
| LMA951702   | <i>T. interdigitale</i> undetermined  | A        | NR                 | NR                                  | NR            |
| IHEM 3997   | <i>T. mentagrophytes</i> G-II*        | A        | NR                 | NR                                  | NR            |
| ENVA-W985   | <i>T. mentagrophytes</i> G-II*        | A        | Dog: Braque        | Skin infection                      | France        |
| ROUT 13     | <i>T. mentagrophytes</i> G-II*        | A        | Human              | ND                                  | France        |
| ENVA-W1330  | <i>T. mentagrophytes</i> G-III        | A        | Dog: Border Collie | Skin infection                      | France        |
| IHEM 14088  | <i>T. mentagrophytes</i> G-III*       | A        | Human              | Skin: leg infection                 | Belgium       |
| IHEM 4268   | <i>T. mentagrophytes</i> G-III*       | A        | Human              | Skin: face infection                | Belgium       |
| IHEM 4270   | <i>T. mentagrophytes</i> G-III*       | A        | Human              | Skin: face infection                | Belgium       |
| ENVA-U9307  | <i>T. mentagrophytes</i> G-III*       | A        | Cat                | Skin infection                      | France        |
| ENVA-W1161  | <i>T. mentagrophytes</i> G-III*       | A        | Dog: Jack Russell  | Skin infection                      | France        |
| ENVA-W1196  | <i>T. mentagrophytes</i> G-III*       | A        | Cat                | Skin infection                      | France        |
| ENVA-W1218  | <i>T. mentagrophytes</i> G-III*       | A        | Dog: Jack Russell  | Skin infection                      | France        |
| ENVA-W1219  | <i>T. mentagrophytes</i> G-III*       | A        | Dog: Whippet       | Skin infection                      | France        |
| ENVA-W1222  | <i>T. mentagrophytes</i> G-III*       | A        | Dog: Boxer         | Skin infection                      | France        |
| SAT 7       | <i>T. mentagrophytes</i> G-III*       | A        | Human              | Hair                                | France        |
| IHEM 19643  | <i>T. mentagrophytes</i> G-IV         | A        | Human              | Skin: foot sole infection           | France        |
| IHEM 14015  | <i>T. mentagrophytes</i> G-V          | A        | Sheep              | Hair                                | South Africa  |
| IHEM 10162  | <i>T. mentagrophytes</i> G-XXIV       | A        | Chinchilla         | Hair                                | Belgium       |
| IHEM 3289   | <i>T. mentagrophytes</i> G-XXIV       | A        | Human              | NR                                  | Belgium       |
| IHEM 3299   | <i>T. mentagrophytes</i> G-XXIV       | A        | Human              | NR                                  | Belgium       |
| ENVA W1207  | <i>T. mentagrophytes</i> undetermined | A        | NR                 | NR                                  | France        |
| MRS1218158  | <i>T. mentagrophytes</i> undetermined | A        | Human              | NR                                  | France        |
| RES-AVC92   | <i>T. indotineae</i>                  | B        | Human              | Skin: inguinal fold infection       | France        |
| SLS-CRTIM10 | <i>T. indotineae</i>                  | B        | Human              | Skin: inguinal fold / leg infection | France        |
| PSL5.768    | <i>T. indotineae</i>                  | B        | Human              | Skin: abdomen infection             | France        |
| RES-AVC30   | <i>T. interdigitale</i> G-I           | B        | Human              | Toenail infection                   | France        |
| RES-BCL12   | <i>T. interdigitale</i> G-I           | B        | Human              | Skin: between toes infection        | France        |
| SLS-CTRL1   | <i>T. interdigitale</i> G-II          | B        | Human              | Toenail infection                   | France        |
| PSL3.420    | <i>T. interdigitale</i> G-II          | B        | Human              | Toenail infection                   | France        |
| PSL4.463    | <i>T. interdigitale</i> G-II          | B        | Human              | Toenail infection                   | France        |
| RES-BCL-173 | <i>T. mentagrophytes</i> G-II*        | B        | Human              | Skin: hand infection                | France        |
| RES-HMD-126 | <i>T. mentagrophytes</i> G-III*       | B        | Human              | Skin: arm infection                 | France        |
| SLS-CTRL7   | <i>T. mentagrophytes</i> G-VI         | B        | Human              | Toenail infection                   | France        |
| PSL3.316    | <i>T. mentagrophytes</i> G-VII        | B        | Human              | Skin: arm infection                 | France        |

Supplemental Table S2: List and origin of the 67 isolates constituting assessment panel 1. G = genotype;

ND = not documented.

| PANEL 1 isolate name | G    | host               | origin                                    | patient origin / known travel |
|----------------------|------|--------------------|-------------------------------------------|-------------------------------|
| IHEM 1106            | I    | Environment        | Floor of a swimming pool in Belgium       | Belgium                       |
| RES-AVC30            | I    | Human              | Toenail infection                         | ND                            |
| RES-AVC56            | I    | Human              | Skin: between toes infection              | ND                            |
| RES-BCL12            | I    | Human              | Skin: between toes infection              | ND                            |
| RES-BCL141           | I    | Human              | Toenail infection                         | ND                            |
| RES-BCL35            | I    | Human              | Toenail infection                         | ND                            |
| RES-SAT28            | I    | Human              | Skin: foot sole infection                 | ND                            |
| RES-SAT73            | I    | Human              | Toenail infection                         | ND                            |
| IDFP 1               | II   | Human              | Skin: arm infection                       | ND                            |
| IDFP 11              | II   | Human              | ND                                        | ND                            |
| IDFP 16              | II   | Human              | Toenail infection                         | ND                            |
| IDFP 2               | II   | Human              | Toenail infection                         | ND                            |
| IHEM 1120            | II   | Environment        | Floor of a swimming pool in Belgium       | Belgium                       |
| IHEM 584             | II   | Human              | Skin: foot sole infection                 | Belgium                       |
| PSL3.420             | II   | Human              | Toenail infection                         | ND                            |
| PSL3.485             | II   | Human              | Toenail infection                         | ND                            |
| PSL4.206             | II   | Human              | Toenail infection                         | ND                            |
| PSL4.207             | II   | Human              | Skin: between toes infection              | ND                            |
| PSL4.37              | II   | Human              | Skin: foot sole infection                 | ND                            |
| PSL4.462             | II   | Human              | Toenail infection                         | ND                            |
| PSL4.463             | II   | Human              | Toenail infection                         | ND                            |
| PSL6.40              | II   | Human              | Toenail infection                         | ND                            |
| PSL6.421             | II   | Human              | Toenail infection                         | ND                            |
| ROUT 1               | II   | Human              | Toenail infection                         | ND                            |
| ROUT 2               | II   | Human              | Toenail infection                         | ND                            |
| ROUT 3               | II   | Human              | Toenail infection                         | ND                            |
| ROUT 5               | II   | Human              | Skin: foot sole infection                 | ND                            |
| ROUT 6               | II   | Human              | Skin: foot sole infection                 | ND                            |
| SLS-CTRL1            | II   | Human              | Toenail infection                         | ND                            |
| SLS-CTRL2            | II   | Human              | Skin: palm/foot sole infection            | ND                            |
| SLS-CTRL4            | II   | Human              | Toenail/foot sole infection               | ND                            |
| SLS-CTRL5            | II   | Human              | Skin: face/between toes infection         | ND                            |
| SLS-CTRL6            | II   | Human              | Toenail/between toes infection            | ND                            |
| SLS-CTRL8            | II   | Human              | Skin: leg infection                       | ND                            |
| ENVA-W985            | II*  | Dog: Braque        | Skin infection                            | ND                            |
| RES-BCL-173          | II*  | Human              | Skin: hand infection                      | ND                            |
| ROUT 13              | II*  | Human              | ND                                        | ND                            |
| ENVA-W1330           | III  | Dog: Border Collie | Skin infection                            | ND                            |
| ENVA-U9307           | III* | Cat                | Skin infection                            | ND                            |
| ENVA-W1161           | III* | Dog: Jack Russell  | Skin infection                            | ND                            |
| ENVA-W1196           | III* | Cat                | Skin infection                            | ND                            |
| ENVA-W1218           | III* | Dog: Jack Russell  | Skin infection                            | ND                            |
| ENVA-W1219           | III* | Dog: Whippet       | Skin infection                            | ND                            |
| ENVA-W1222           | III* | Dog: Boxer         | Skin infection                            | ND                            |
| RES-HMD-126          | III* | Human              | Skin: arm infection                       | ND                            |
| SAT 7                | III* | Human              | Hair                                      | ND                            |
| SLS-CTRL7            | VI   | Human              | Toenail infection                         | ND                            |
| PSL3.316             | VII  | Human              | Skin: arm infection                       | ND                            |
| AVC4                 | VIII | Human              | Skin: inguinal fold/abdomen/leg infection | Bangladesh                    |
| AVC4b                | VIII | Human              | Skin: inguinal fold/abdomen/leg infection | Bangladesh                    |
| AVC6                 | VIII | Human              | Skin: inguinal fold/abdomen/leg infection | Myanmar                       |
| HOUS3                | VIII | Human              | ND                                        | ND                            |
| PSL5.768             | VIII | Human              | Skin: abdomen infection                   | Tibet                         |
| PSL5.769             | VIII | Human              | Skin: inguinal fold infection             | Tibet                         |
| RES-AVC92            | VIII | Human              | Skin: inguinal fold infection             | India                         |
| RES-BCH16            | VIII | Human              | Fingernail infection                      | ND                            |
| RES-BCL120           | VIII | Human              | Toenail infection                         | ND                            |
| RES-BCL75            | VIII | Human              | Axillary fold infection                   | ND                            |
| SAT1                 | VIII | Human              | Skin: inguinal fold/abdomen/leg infection | Bangladesh                    |
| SAT-HOU1             | VIII | Human              | Skin: inguinal fold/abdomen/leg infection | Bangladesh                    |

|                    |      |       |                                             |            |
|--------------------|------|-------|---------------------------------------------|------------|
| <b>SEB1</b>        | VIII | Human | Skin: inguinal fold/abdomen / leg infection | Bangladesh |
| <b>SLS-CRTIM10</b> | VIII | Human | Skin: inguinal fold/leg infection           | India      |
| <b>SLS-CRTIM11</b> | VIII | Human | Skin: thigh/abdomen/arms infection          | India      |
| <b>SLS-CRTIM13</b> | VIII | Human | Skin: thigh/back/inguinal fold              | Tibet      |
| <b>SLS-CRTIM3</b>  | VIII | Human | Skin: inguinal fold/abdomen/leg infection   | India      |
| <b>SLS-CRTIM4</b>  | VIII | Human | Skin: legs/trunk/arms infection             | Bangladesh |
| <b>SLS-CRTIM9</b>  | VIII | Human | Skin: legs/arms infection                   | India      |

Supplemental Table S3: List of the DNA references used for *Trichophyton mentagrophytes* species complex genotyping.

| Accession number | Genotype                                          |
|------------------|---------------------------------------------------|
| FM986691         | <i>Trichophyton interdigitale</i> genotype I      |
| JX122216         | <i>Trichophyton interdigitale</i> genotype II     |
| KP132819         | <i>Trichophyton mentagrophytes</i> genotype II*   |
| FM986750         | <i>Trichophyton mentagrophytes</i> genotype III   |
| MF926358         | <i>Trichophyton mentagrophytes</i> genotype III*  |
| KJ606102         | <i>Trichophyton mentagrophytes</i> genotype IV    |
| KU496915         | <i>Trichophyton mentagrophytes</i> genotype V     |
| KT285210         | <i>Trichophyton mentagrophytes</i> genotype VI    |
| KT253558         | <i>Trichophyton mentagrophytes</i> genotype VII   |
| KT192500         | <i>Trichophyton indotineae</i>                    |
| MK447613         | <i>Trichophyton mentagrophytes</i> genotype IX    |
| MK312735         | <i>Trichophyton interdigitale</i> genotype X      |
| MK312755         | <i>Trichophyton interdigitale</i> genotype XI     |
| MF109039         | <i>Trichophyton interdigitale</i> genotype XII    |
| MK312917         | <i>Trichophyton mentagrophytes</i> genotype XIII  |
| MK312950         | <i>Trichophyton mentagrophytes</i> genotype XIV   |
| MK312937         | <i>Trichophyton mentagrophytes</i> genotype XV    |
| MK312933         | <i>Trichophyton mentagrophytes</i> genotype XVI   |
| MK312990         | <i>Trichophyton mentagrophytes</i> genotype XVII  |
| MK313028         | <i>Trichophyton mentagrophytes</i> genotype XVIII |
| MK312878         | <i>Trichophyton mentagrophytes</i> genotype XIX   |
| MK313030         | <i>Trichophyton mentagrophytes</i> genotype XX    |
| MK312891         | <i>Trichophyton mentagrophytes</i> genotype XXI   |
| MK312888         | <i>Trichophyton mentagrophytes</i> genotype XXII  |
| MK313044         | <i>Trichophyton mentagrophytes</i> genotype XXIII |
| AF170453         | <i>Trichophyton mentagrophytes</i> genotype XXIV  |
| MT858874         | <i>Trichophyton interdigitale</i> genotype XXV    |
| MT858956         | <i>Trichophyton mentagrophytes</i> genotype XXVI  |
